# Supplementary material for: Prognostic nutritional index predicts acute kidney injury and mortality of patients in the coronary care unit
Source: PubMed Central journal article supplement — Exp Ther Med. 2020 Dec 3;21(2):123. doi: 10.3892/etm.2020.9555 (PMC7739862; doi:10.3892/etm.2020.9555), 2020-12-03

Figure S1. DCA for PNI value and clinical model to detect its clinical usefulness in the validation cohort. (A) The DCA of PNI and clinical model for the development of AKI; (B) the DCA of PNI and clinical model for in-hospital mortality; (C) the DCA of PNI and clinical model for 2-year mortality. DCA, Decision curves analysis; PNI, prognostic nutritional index.

**A**

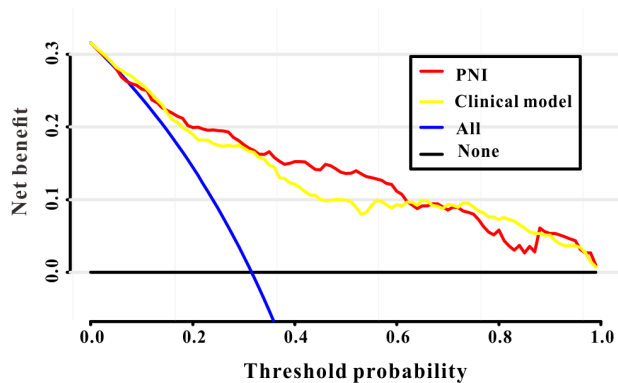

**B**

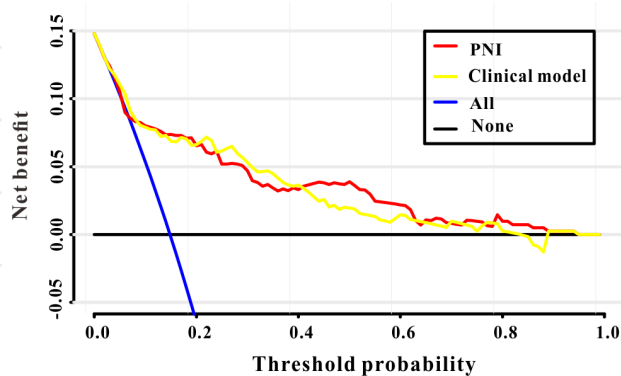

**C**

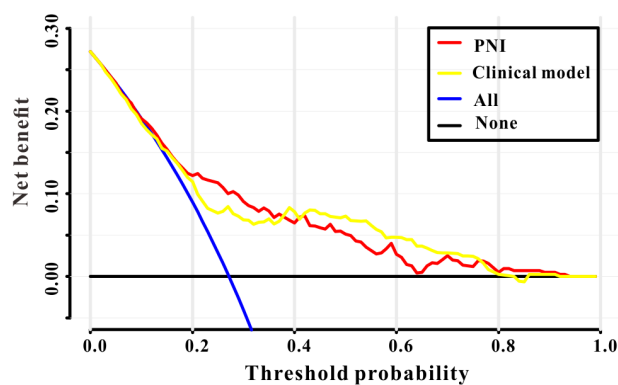

Supplement: Supplementary_Data.pdf [file Supplementary_Data.pdf]
